# Supplementary material
Source: Springer Nature journal article supplement (https://www.springermedizin.de/resource/supplementary/12891_2007_405_MOESM3_ESM.pdf/9510974)

Patient No 1

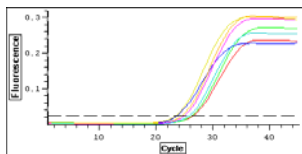

Patient No 2

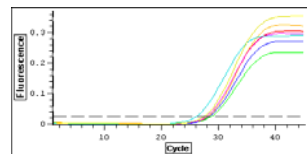

Patient No 3

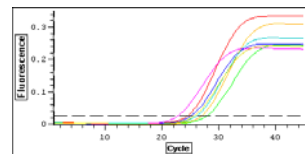

Patient No 4

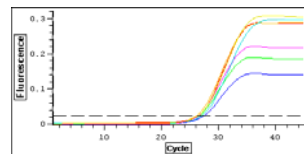

Patient No 5

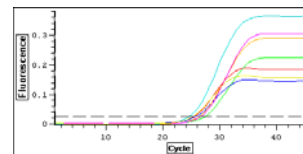

Patient No 6

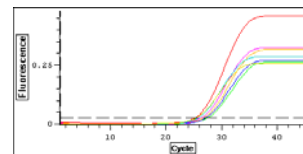

BMP-2

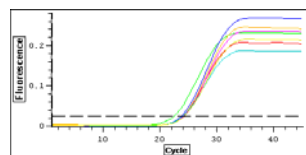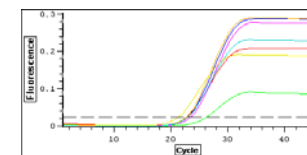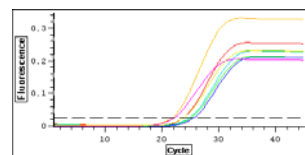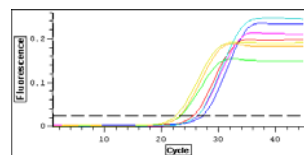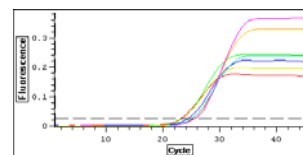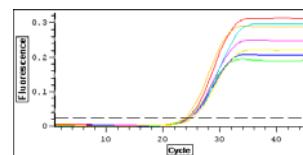

BMP-4

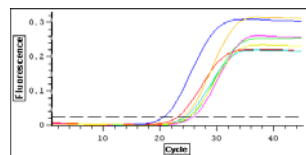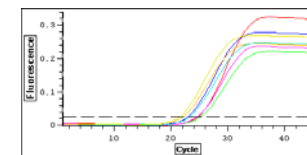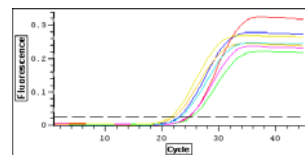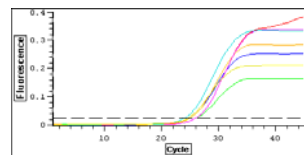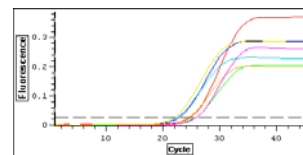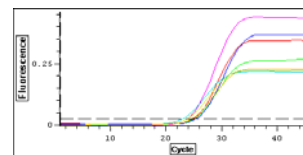

beta-actin

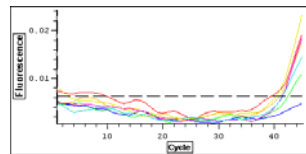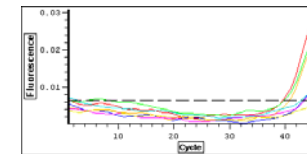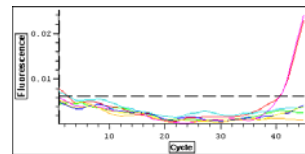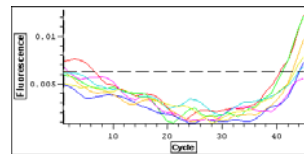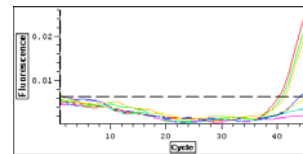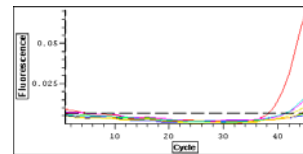

BMP-6

Bones: — 1; — 2; — 3; — 4; — 5; — 6; — 7

Supplement: MOESM3 [file 9510974]
